# Supplementary material for: Counter-ion influence on the coordination mode of the 2,5-bis(4-pyridyl)-1,3,4-oxadiazole (bpo) ligand in mercury(ii) coordination polymers, [Hg(bpo)nX2]: X = I–, Br–, SCN–, N3– and NO2–; spectroscopic, thermal, fluorescence and structural studies
Source: Royal Society of Chemistry journal article supplement (doi:10.1039/b707228g), 2007-01-01
Supplement: b707228g.pdf [file b707228g.pdf]

Electronic Supplementary Material for CrystEngComm  
This journal is © The Royal Society of Chemistry 2007

## **Electronic Supplementary Information for MS:**

**Counter-ions Influence on Coordination Mode of 2,5-Bis(4-pyridyl)-  
1,3,4-oxadiazole (bpo) Ligand in Mercury(II) Coordination Polymers,  
[Hg(bpo)<sub>n</sub>X<sub>2</sub>]: X = I, Br<sup>-</sup>, SCN<sup>-</sup>, N<sub>3</sub><sup>-</sup> and NO<sub>2</sub><sup>-</sup>; Spectroscopic, Thermal,  
Fluorescence and Structural Studies**

**Ghodrat Mahmoudi, Ali Morsali\***

Department of Chemistry, Faculty of Sciences, Tarbiat Modares University, P.O. Box  
14115-175, Tehran, Islamic Republic of Iran

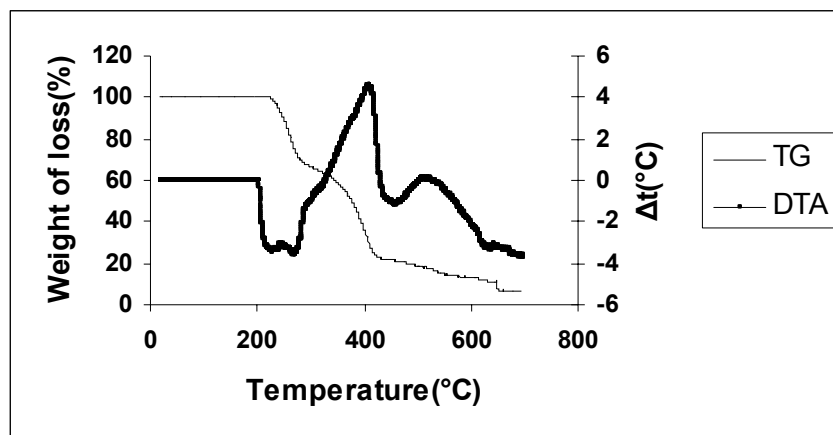

Figure S1. Thermal behaviour of [Hg(bpo)(SCN)<sub>2</sub>]<sub>n</sub> (1).

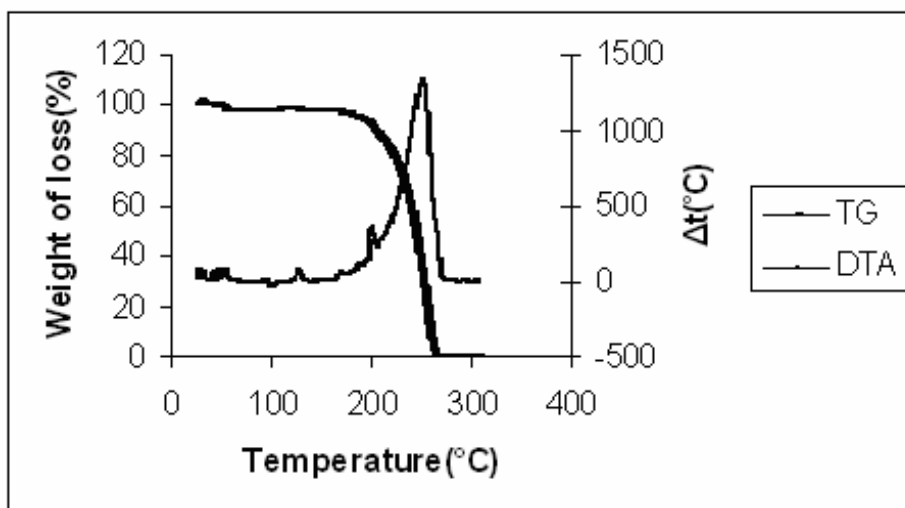

**Figure S2.** Thermal behaviour of  $[\text{Hg}_2(\mu\text{-bpo})\text{I}_4]_2$  (2).

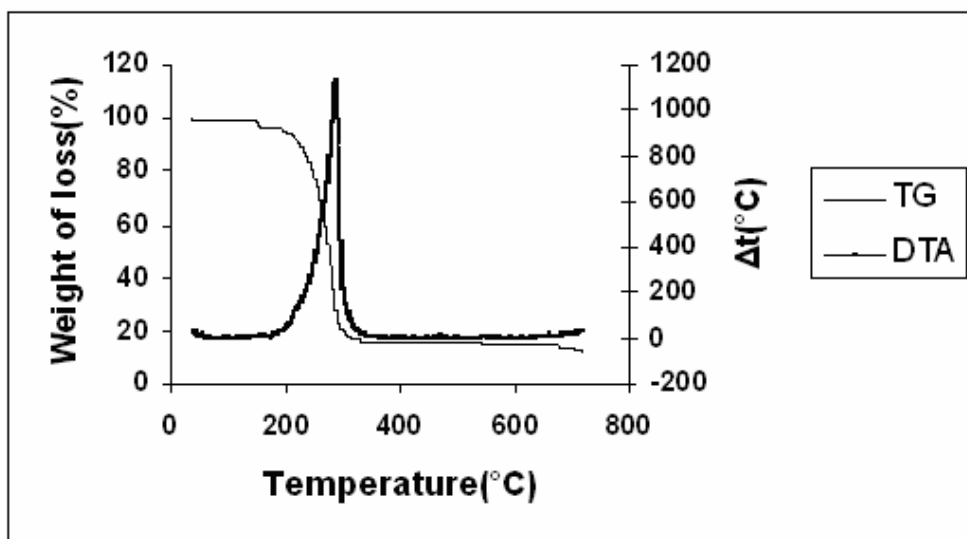

**Figure S3.** Thermal behaviour of [Hg(μ-bpo)Br<sub>2</sub>]<sub>n</sub> (3).

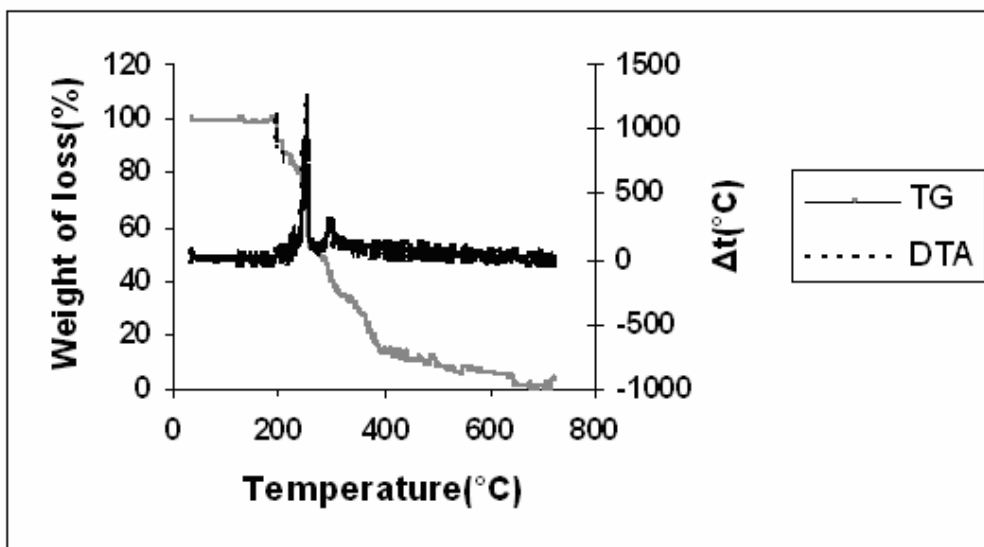

Figure S4. Thermal behaviour of [Hg(μ-bpo)(NO<sub>2</sub>)<sub>2</sub>]<sub>n</sub> (4).

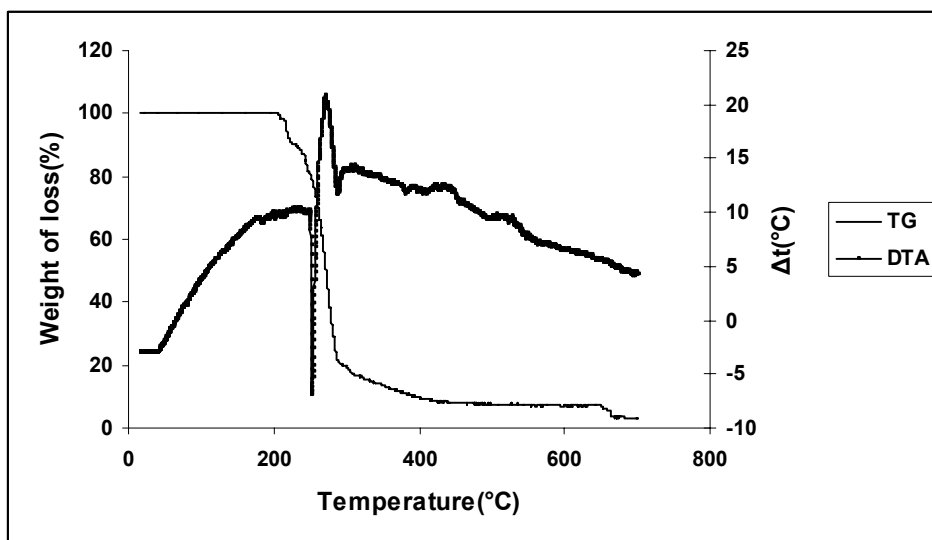

Figure S5. Thermal behaviour of  $[\text{Hg}(\mu\text{-bpo})_2(\text{N}_3)_2]_n$  (5).

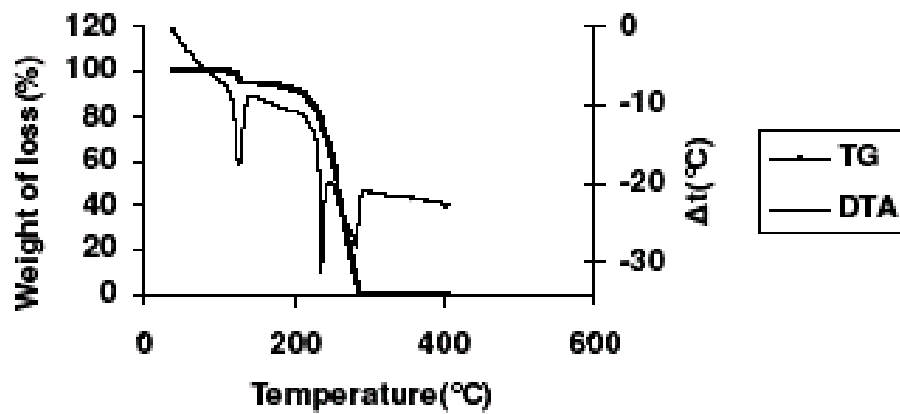

Figure S6. Thermal behaviour of  $[\text{Hg}(\mu\text{-bpo})\text{I}_2]\cdot\text{CH}_3\text{CN}$  (**6**).

**Table S1.** Selected bond lengths /Å and angles /° for [Hg(bpo)(μ-SCN)<sub>2</sub>]<sub>n</sub> (1)

---

|           |            |
|-----------|------------|
| Hg1-S1    | 2.4046(15) |
| Hg1-S2    | 2.4158(17) |
| Hg1-N1    | 2.430(5)   |
| Hg1-N6    | 2.548(6)   |
| S1-Hg1-S2 | 149.60(6)  |
| S1-Hg1-N1 | 110.12(13) |
| S2-Hg1-N1 | 98.66(13)  |
| S1-Hg1-N6 | 98.38(14)  |
| S2-Hg1-N6 | 92.67(15)  |

---

**Table S2.** Selected bond lengths /Å and angles /° for [Hg<sub>2</sub>(μ-bpo)I<sub>4</sub>]<sub>2</sub> (2)

---

|                         |            |
|-------------------------|------------|
| Hg1-N1                  | 2.445(10)  |
| Hg1-I1                  | 2.6027(12) |
| Hg1-I2                  | 2.6712(10) |
| Hg1-I3                  | 3.1038(11) |
| Hg2-N4 <sup>i</sup>     | 2.388(10)  |
| Hg2-I4                  | 2.6262(10) |
| Hg2-I3                  | 2.6442(11) |
| N1-Hg1-I1               | 106.5(3)   |
| N1-Hg1-I2               | 99.3(3)    |
| I1-Hg1-I2               | 145.55(4)  |
| N1-Hg1-I3               | 92.4(3)    |
| I1-Hg1-I3               | 103.53(3)  |
| I2-Hg1-I3               | 97.72(3)   |
| N4 <sup>i</sup> -Hg2-I4 | 106.1(3)   |
| N4 <sup>i</sup> -Hg2-I3 | 105.0(3)   |
| I4-Hg2-I3               | 148.77(4)  |

---

i: -x, -y, -z



**Table S3.** Selected bond lengths /Å and angles /° for [Hg( $\mu$ -bpo)Br<sub>2</sub>]<sub>n</sub> (**3**)

---

|                          |            |
|--------------------------|------------|
| Hg1-Br1                  | 2.4754(6)  |
| Hg1-Br2                  | 2.4878(6)  |
| Hg1-N1                   | 2.425(4)   |
| Hg1-N4 <sup>i</sup>      | 2.459(4)   |
| N1-Hg1-N4 <sup>i</sup>   | 101.91(15) |
| N1-Hg1-Br1               | 104.24(10) |
| N4 <sup>i</sup> -Hg1-Br1 | 100.00(10) |
| N1-Hg1-Br2               | 95.38(10)  |
| N4 <sup>i</sup> -Hg1-Br2 | 96.80(10)  |
| Br1-Hg1-Br2              | 150.79(2)  |

---

i: -x, y+1/2, -z+1/2

**Table S4.** Selected bond lengths /Å and angles /° for [Hg( $\mu$ -bpo)(NO<sub>2</sub>)<sub>2</sub>]<sub>n</sub> (**4**)

---

|                         |            |
|-------------------------|------------|
| Hg1-N4 <sup>i</sup>     | 2.291(3)   |
| Hg1-O3                  | 2.319(3)   |
| Hg1-O5                  | 2.333(3)   |
| Hg1-N1                  | 2.339(3)   |
| Hg1-O4                  | 2.529(3)   |
| Hg1-O2                  | 2.622(3)   |
| N4 <sup>i</sup> -Hg1-O3 | 129.70(10) |
| N4 <sup>i</sup> -Hg1-O5 | 122.96(11) |
| O3-Hg1-O5               | 88.15(11)  |
| N4 <sup>i</sup> -Hg1-N1 | 98.92(10)  |
| O3-Hg1-N1               | 99.20(10)  |
| O5-Hg1-N1               | 117.24(11) |
| N4 <sup>i</sup> -Hg1-O4 | 92.52(10)  |
| O3-Hg1-O4               | 135.04(10) |
| O5-Hg1-O4               | 51.13(10)  |
| N1-Hg1-O4               | 86.57(10)  |
| N4 <sup>i</sup> -Hg1-O2 | 83.08(9)   |
| O3-Hg1-O2               | 50.06(9)   |
| O5-Hg1-O2               | 133.94(9)  |
| N1-Hg1-O2               | 91.25(9)   |
| O4-Hg1-O2               | 174.74(8)  |

---

i: -x+2, y-1/2, -z+1/2

**Table S5.** Selected bond lengths /Å and angles /° for [Hg( $\mu$ -bpo)<sub>2</sub>(N<sub>3</sub>)<sub>2</sub>]<sub>n</sub> (**5**)

---

|                                         |             |
|-----------------------------------------|-------------|
| Hg1-N5                                  | 2.091(3)    |
| Hg1-N3                                  | 2.698(3)    |
| Hg1-N1 <sup>ii</sup>                    | 2.757(3)    |
| Hg1-N1 <sup>iii</sup>                   | 2.757(3)    |
| N5-Hg1-N5 <sup>i</sup>                  | 180.00(18)  |
| N5 <sup>i</sup> -Hg1-N3                 | 86.09(10)   |
| N5-Hg1-N3                               | 93.91(10)   |
| N3 <sup>i</sup> -Hg1-N3                 | 180.00(11)  |
| N5 <sup>i</sup> -Hg1-N1 <sup>ii</sup>   | 92.20(10)   |
| N5-Hg1-N1 <sup>ii</sup>                 | 87.80(10)   |
| N3 <sup>i</sup> -Hg1-N1 <sup>ii</sup>   | 95.57(9)    |
| N3-Hg1-N1 <sup>ii</sup>                 | 84.43(9),   |
| N1 <sup>ii</sup> -Hg1-N1 <sup>iii</sup> | 180.00(15). |

---

i: -x, -y, -z ii: -x, y+1/2, -z+1/2 iii: x, -y+1/2, z+1/2
